# Supplementary material
Source: PubMed Central journal article supplement (PMC3535939)

## ***In vitro* Cytostatic and Cytocidal Activity of Quinoline Antimalarial Drugs vs. Inhibition of Hemozoin Crystal Growth**

**Supplemental Information Available:** Propionate buffer optimization, lipid catalyst concentration optimization, physical and pharmacokinetic properties, antiplasmodial IC<sub>50</sub> and LD<sub>50</sub>, and BHIA IC<sub>50</sub> for all antiplasmodial drugs and drug analogues; <sup>1</sup>H and <sup>13</sup>C NMR spectra for compounds synthesized in this study (6-9).

Alexander P. Gorka<sup>\*</sup>, John N. Alumasa<sup>a,\*</sup>, Katy S. Sherlach, Lauren M. Jacobs, Katherine B. Nickley<sup>b</sup>, Jonathan P. Brower<sup>c</sup>, Angel C. de Dios, and Paul D. Roepe<sup>#</sup>

Department of Chemistry, Department of Biochemistry, Cellular, & Molecular Biology, and  
Center for Infectious Diseases

Georgetown University, 37<sup>th</sup> and O Sts. NW, Washington, DC 20057

<sup>a</sup>Current Address: Department of Biochemistry & Molecular Biology, The Pennsylvania State University, University Park, PA 16802

<sup>b</sup>Current Address: Georgetown University School of Medicine, 3900 Reservoir Rd. NW, Washington, DC 20057

<sup>c</sup>Current Address: Tufts University School of Medicine, 136 Harrison Ave., Boston, MA 02110

Supported by NIH grants AI045957 (PDR) and AI060792 (AdD, PDR)

<sup>#</sup>Address correspondence to PDR: Tel +1 202 687 7300; Fax +1 202 687 6209;

E-mail: [roepep@georgetown.edu](mailto:roepep@georgetown.edu)

\*A. Gorka and J. Alumasa contributed equally to the presented work.

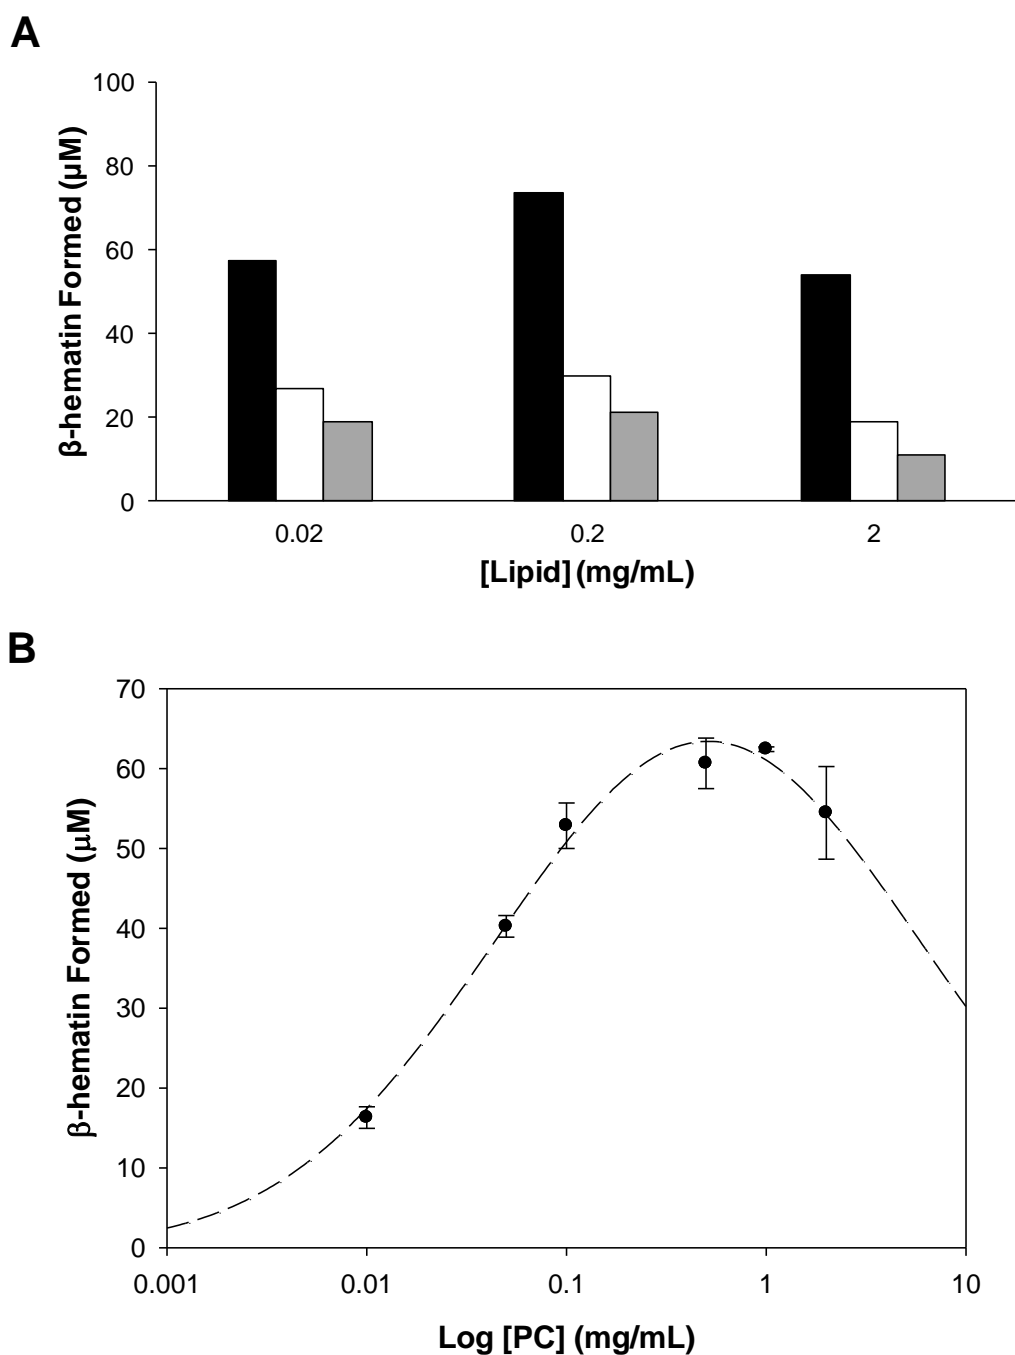

**Figure S1.** Optimization of lipid catalyst concentration. A) Effect of PC (solid bars), 1-monopalmitin (pMAG, open bars), and 1-monostearin (sMAG, shaded bars) on Hz yield; B) Effect of PC concentration on Hz yield. Hz yield was measured in the presence of 100  $\mu$ M FPIX, 1 M propionate buffer (pH 5.2) at 37  $^{\circ}$ C over a 4 h period. Error bars represent the standard error of the mean resulting from three replicate measurements.

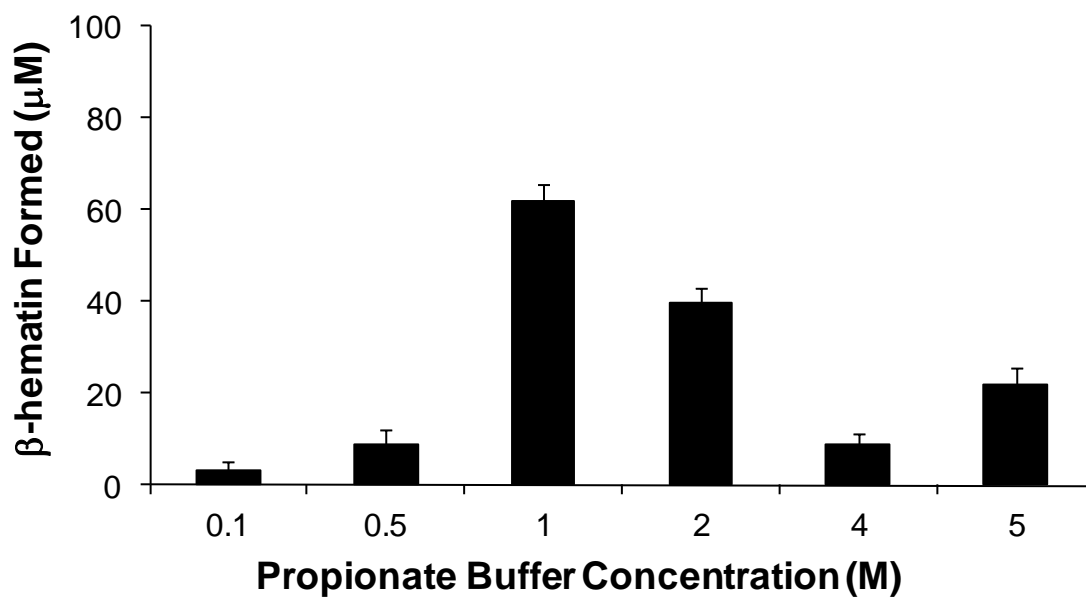

**Figure S2.** Optimization of propionate buffer concentration. The effect of propionate buffer concentration on Hz yield was measured at pH 5.2 in the presence of 100  $\mu\text{M}$  FPIX and 0.5 mg/mL PC at 37  $^{\circ}\text{C}$  using the 16 h assay described in the Methods. Error bars represent the standard error of the mean resulting from three replicate measurements.

**Table S1.** Physical and pharmacokinetic properties, antiplasmodial IC<sub>50</sub> and LD<sub>50</sub>, and BHIA IC<sub>50</sub> for antimalarial drugs and drug analogues used in this work.

| Cpd ID | MW (g/mol) | pKa <sup>a</sup>     | ClogP <sup>b</sup> | Diffusion Coefficient (x 10 <sup>-6</sup> cm <sup>2</sup> /s) <sup>c</sup> | Antiplasmodial IC <sub>50</sub> (nM) <sup>d</sup> |               | Antiplasmodial LD <sub>50</sub> (μM) <sup>e</sup> |                           | BHIA IC <sub>50</sub> (μM) <sup>d</sup> |              |
|--------|------------|----------------------|--------------------|----------------------------------------------------------------------------|---------------------------------------------------|---------------|---------------------------------------------------|---------------------------|-----------------------------------------|--------------|
|        |            |                      |                    |                                                                            | HB3                                               | Dd2           | HB3                                               | Dd2                       | pH 5.6                                  | pH 5.2       |
| CQ     | 318.19     | 7.65<br>9.86         | 4.65               | 5.00                                                                       | 19.6 (0.4)                                        | 201.5 (9.1)   | 0.12 (0.01)                                       | 16.5 (2.1)                | 52.9 (8.0)                              | 194.9 (5.6)  |
| QN     | 324.42     | 5.69<br>9.10         | 3.26               | 5.00                                                                       | 107.2 (12.4)                                      | 265.6 (14.6)  | 9.1 (0.4)                                         | 36.3 (9.1)                | 42.5 (8.3)                              | 255.4 (22.7) |
| QD     | 324.42     | 5.69<br>9.10         | 3.26               | 5.00                                                                       | 41.9 (6.0)                                        | 174.2 (3.1)   | 0.43 (0.1)                                        | 33.6 (0.1)                | 27.2 (2.7)                              | 176.2 (4.9)  |
| AQ     | 355.86     | 5.84<br>9.88         | 4.09               | 4.82                                                                       | 10.0 (3.3)                                        | 27.7 (2.9)    | 0.04 (0.007) <sup>f</sup>                         | 0.05 (0.004) <sup>f</sup> | 22.1 (0.9)                              | 70.1 (1.3)   |
| 1      | 294.95     | 5.11<br>8.59         | 4.58               | 5.26                                                                       | 9530.0 (39.5)                                     | 5500.0 (28.2) | 79.9 (0.1)                                        | 94.4 (0.8)                | 39.6 (2.2)                              | 312.6 (10.1) |
| 2      | 305.90     | 7.50<br>9.81         | 4.34               | 4.99                                                                       | 6.0 (0.7)                                         | 26.0 (3.5)    | 0.23 (0.01)                                       | 0.52 (0.01)               | 8.2 (0.9)                               | 37.8 (6.2)   |
| 3      | 319.90     | 7.56<br>9.48         | 4.82               | 4.82                                                                       | 12.0 (0.9)                                        | 199.0 (11.1)  | 3.8 (0.1)                                         | 15.7 (1.0)                | 11.2 (2.0)                              | 65.2 (8.1)   |
| 4      | 363.92     | 4.93<br>7.48<br>9.58 | 5.16               | 4.45                                                                       | 95.0 (10.6)                                       | 169.0 (16.2)  | 7.1 (0.1)                                         | 41.3 (0.1)                | 17.0 (2.5)                              | 117.0 (12.6) |

|          |        |                      |      |      |               |               |             |            |              |              |
|----------|--------|----------------------|------|------|---------------|---------------|-------------|------------|--------------|--------------|
| <b>5</b> | 362.90 | 7.70<br>9.35         | 3.15 | 4.48 | 79.0 (5.9)    | 94.0 (10.7)   | 0.80 (0.01) | 51.5 (5.1) | 7.2 (1.2)    | 142.4 (14.9) |
| <b>6</b> | 249.74 | 7.65<br>10.04        | 2.44 | 5.97 | 2990.0 (31.8) | 2390.0 (33.4) | 45.2 (0.1)  | 17.4 (1.3) | 44.5 (7.5)   | 209.0 (17.1) |
| <b>7</b> | 292.92 | 7.44<br>9.17         | 4.40 | 4.46 | > 10000       | 3720.0 (42.5) | 2.8 (0.02)  | 2.7 (0.01) | 53.0 (8.2)   | 96.0 (12.4)  |
| <b>8</b> | 451.00 | 7.64<br>8.05         | 4.39 | 4.13 | 1680.0 (23.5) | 6970.0 (51.2) | 2.8 (0.02)  | 3.9 (0.07) | 52.5 (6.1)   | 172.5 (16.3) |
| <b>9</b> | 350.89 | 7.64<br>8.99<br>9.55 | 1.40 | 4.82 | 1390.0 (19.5) | 8070.0 (62.3) | 8.6 (0.05)  | 2.8 (0.01) | 117.5 (19.2) | 121.5 (18.3) |

<sup>a</sup>Calculated using the SPARC online calculator ([sparc.chem.uga.edu/sparc/liqpka/index.cfm?ionize=N13](http://sparc.chem.uga.edu/sparc/liqpka/index.cfm?ionize=N13)). pKas are for the quinolinyl and side chain aliphatic nitrogens, respectively, with the former listed from left to right beginning at the quinoline branch point (see Figure 5).

<sup>b</sup>Calculated for octanol/water using the SPARC online calculator.

<sup>c</sup>Calculated for water diffusion using the SPARC online calculator.

<sup>d</sup>IC<sub>50</sub> values are an average of three independent trials, each performed in triplicate (9 replicates total). SEM is shown in parentheses.

<sup>e</sup>LD<sub>50</sub> values are an average of two independent trials, each performed in triplicate (6 replicates total). SEM is shown in parentheses.

<sup>f</sup>Paguio MF, Bogle KL, Roepe PD. 2011. *Plasmodium falciparum* resistance to cytotoxic versus cytostatic effects of chloroquine. Mol. Biochem. Parasitol. **178**:1-6.

### <sup>1</sup>H NMR Spectrum (400 MHz, CDCl<sub>3</sub>) for 6

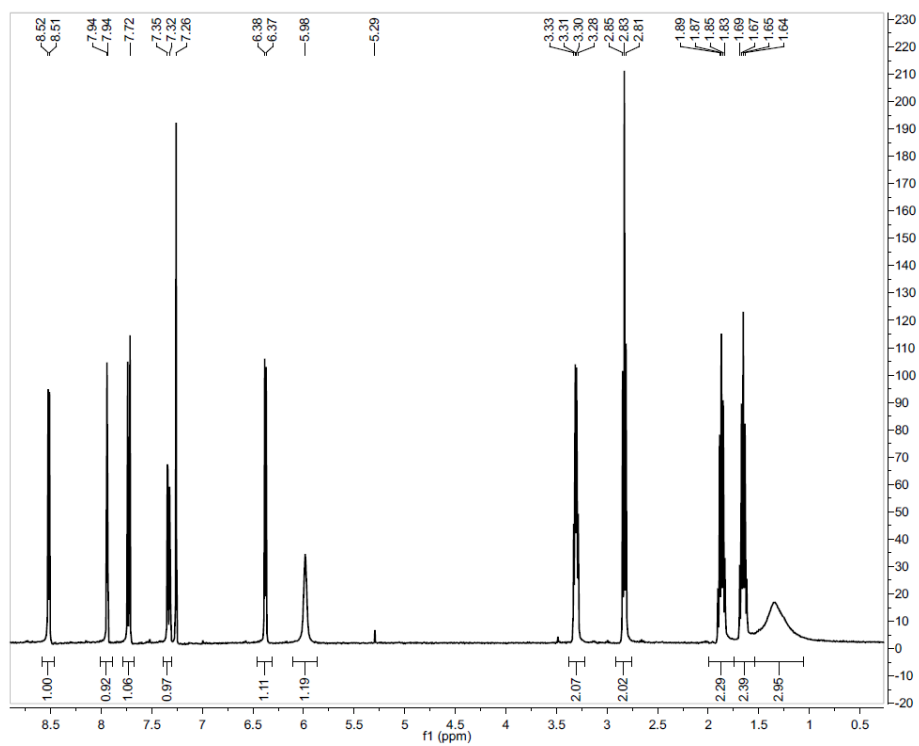

### <sup>13</sup>C NMR Spectrum (100 MHz, CDCl<sub>3</sub>) for 6

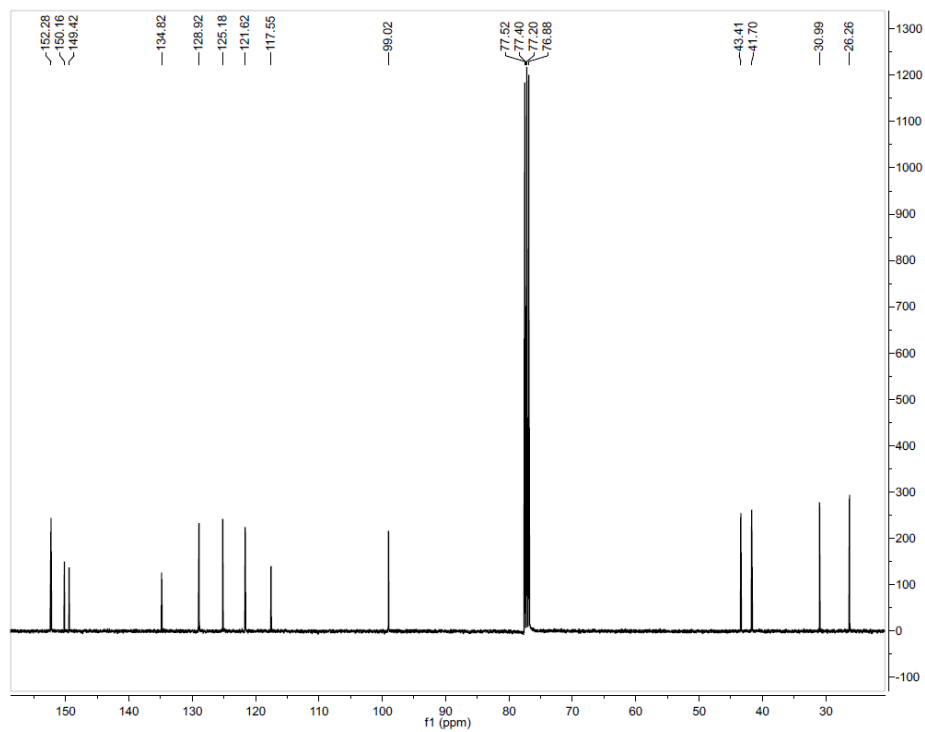

### <sup>1</sup>H NMR Spectrum (400 MHz, CDCl<sub>3</sub>) for 7

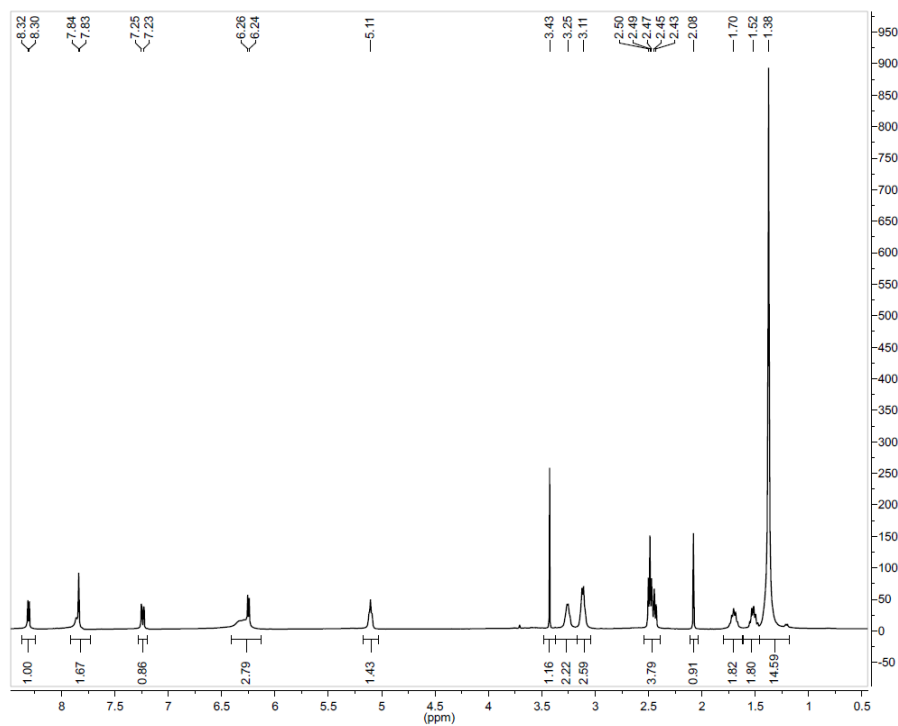

### <sup>13</sup>C NMR Spectrum (100 MHz, CDCl<sub>3</sub>) for 7

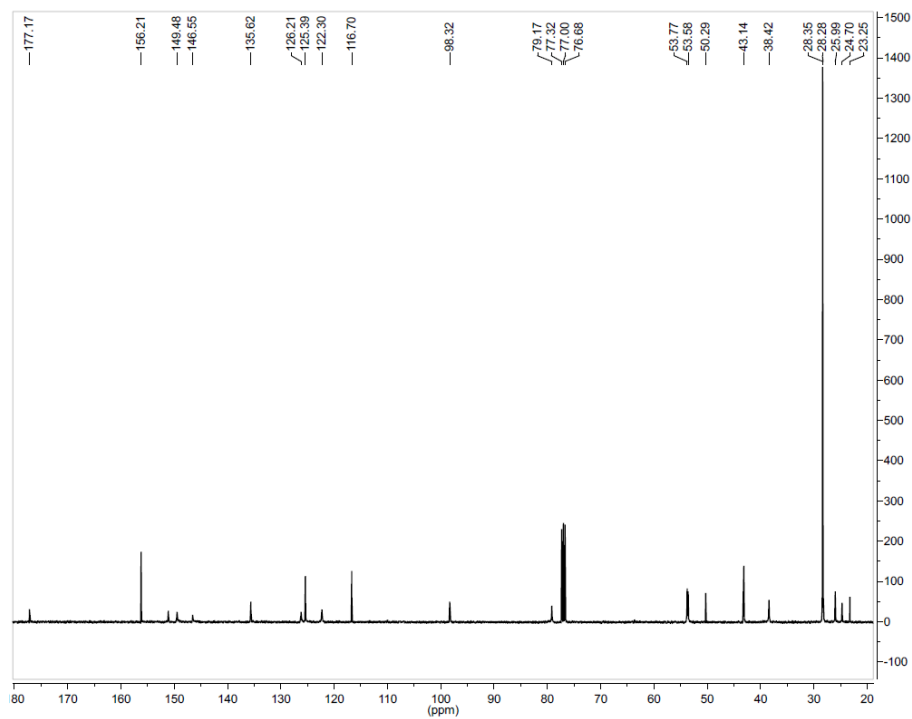

### <sup>1</sup>H NMR Spectrum (400 MHz, CDCl<sub>3</sub>) for 8

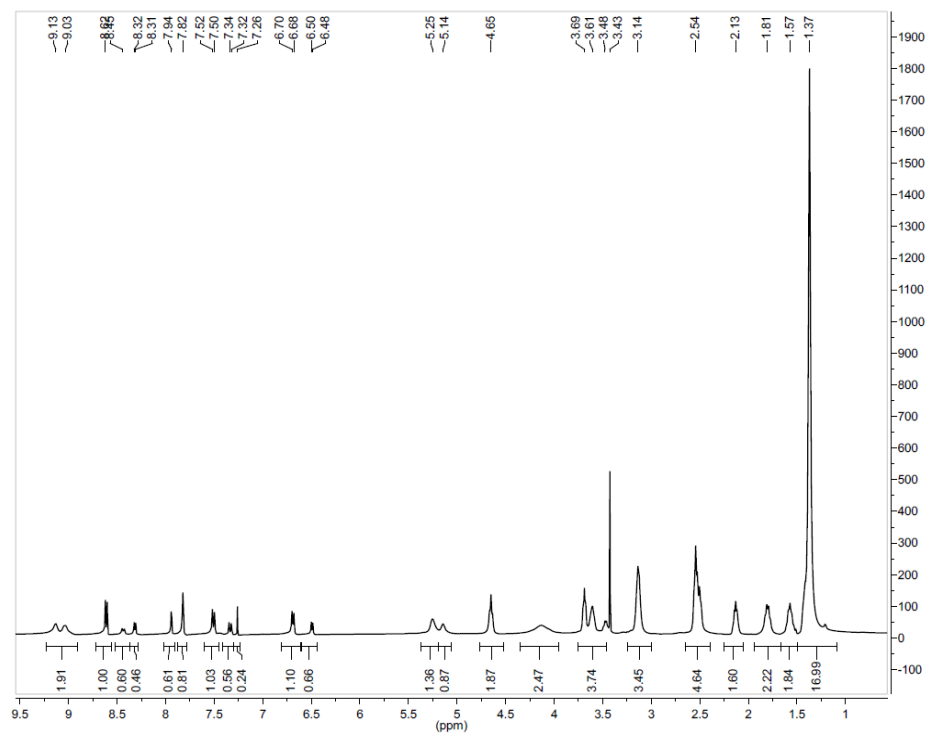

### <sup>13</sup>C NMR Spectrum (100 MHz, CDCl<sub>3</sub>) for 8

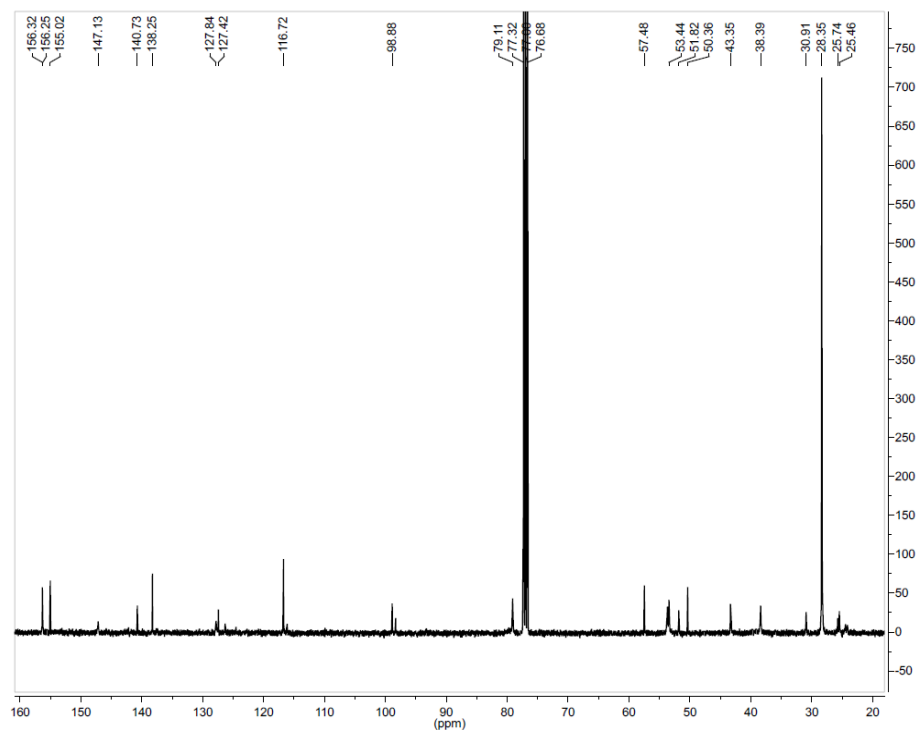



### <sup>1</sup>H NMR Spectrum (400 MHz, CDCl<sub>3</sub>) for 9

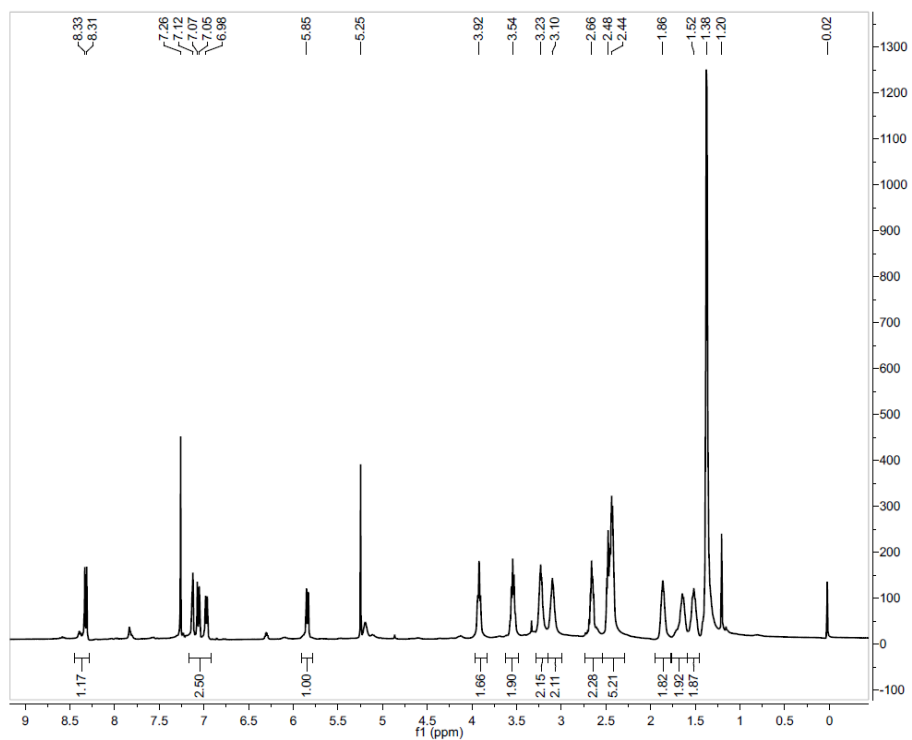

### <sup>13</sup>C NMR Spectrum (100 MHz, CDCl<sub>3</sub>) for 9

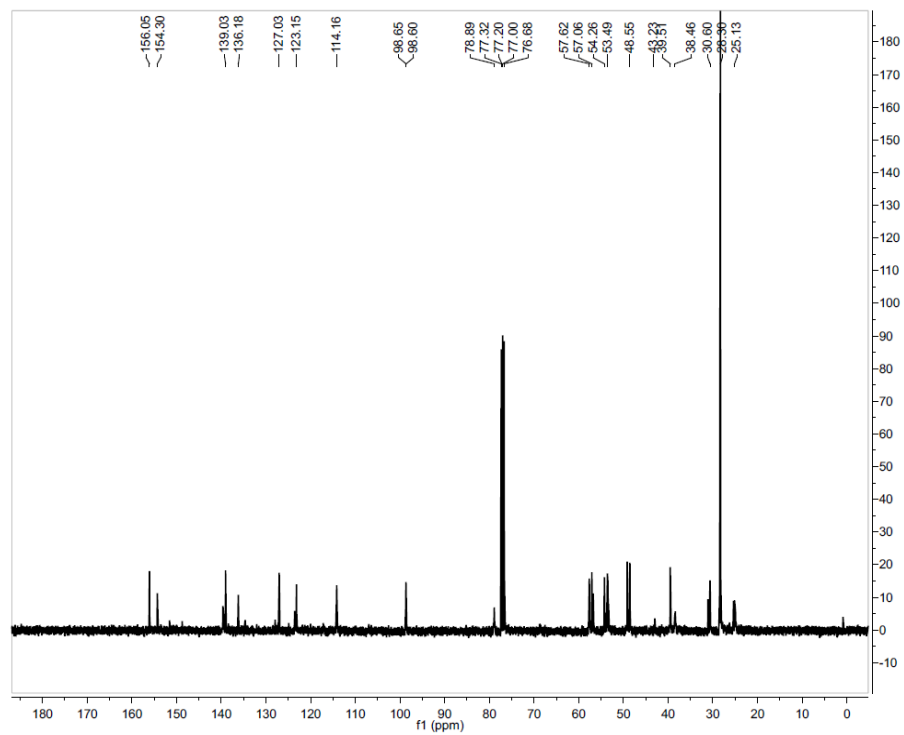

Supplement: AAC.01709-12_zac999101501so1.pdf [file AAC.01709-12_zac999101501so1.pdf]
